# Supplementary material
Source: HighWire-hosted journal article supplement (https://erj.ersjournals.com/content/55/6/2001261)
Supplement: inline-supplementary-material-1 [file inline-supplementary-material-1.pdf]

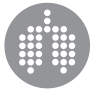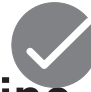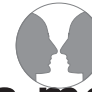

# COVID-19 and nicotine as a mediator of ACE-2

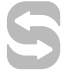

SHAREABLE PDF

Janice M. Leung<sup>1,2</sup>, Chen Xi Yang<sup>1</sup> and Don D. Sin<sup>1,2</sup>

**Affiliations:** <sup>1</sup>Centre for Heart Lung Innovation, University of British Columbia, Vancouver, BC, Canada. <sup>2</sup>Division of Respiratory Medicine, Dept of Medicine, St. Paul's Hospital, Vancouver, BC, Canada.

**Correspondence:** Don D. Sin, Division of Respiratory Medicine, Dept of Medicine, St. Paul's Hospital, 1081 Burrard Street, Vancouver, BC V6Z1Y6, Canada. E-mail: Don.Sin@hli.ubc.ca

 @ERSpublications  
 **$\alpha$ 7-nAChR may upregulate ACE-2** <https://bit.ly/2xS0cfT>

**Cite this article as:** Leung JM, Yang CX, Sin DD. COVID-19 and nicotine as a mediator of ACE-2. *Eur Respir J* 2020; 55: 2001261 [<https://doi.org/10.1183/13993003.01261-2020>].

This single-page version can be shared freely online.

## *From the authors:*

We recently reported that current smokers and those with COPD had higher airway epithelial cell expression of the angiotensin-converting enzyme II (ACE-2) viral entry receptor [1]. We thus read with great interest the work of P. Russo and co-workers, which proposes a mechanism for this finding, namely that this upregulation is mediated by nicotine exposure specifically through the  $\alpha$ 7 subtype of nicotine acetylcholine receptors ( $\alpha$ 7-nAChR). While exposure to increasing concentrations of nicotine caused epithelial cells to increase ACE-2 levels, subsequent gene silencing of  $\alpha$ 7-nAChR appeared to significantly dampen this response. A secondary transcriptome sequencing analysis of our cohort (consisting of 42 subjects who underwent bronchoscopy for epithelial cell brushings [1]) reveals evidence in support of this hypothesis. We found that airway epithelial cell expression of *CHRNA7*, encoding  $\alpha$ 7-nAChR, was significantly correlated with the expression of *ACE2* (Pearson  $r=0.54$ ,  $p=2.31\times 10^{-8}$ ) (figure 1). There was significantly higher *CHRNA7* expression in those with COPD ( $2.75\pm 0.73$  versus  $2.14\pm 0.43$  in those without COPD;  $p=1.47\times 10^{-4}$ ), with a trend towards higher expression in current smokers compared to former and never smokers ( $2.86\pm 0.92$  in current smokers,  $2.35\pm 0.57$  in former smokers, and  $2.27\pm 0.45$  in never smokers;  $p=6.16\times 10^{-2}$ ). *CHRNA7* was also negatively correlated with forced expiratory volume in 1 s percent predicted (Pearson  $r=-0.37$ ,  $p=2.83\times 10^{-4}$ ). Interestingly, *CHRNA7* was positively if weakly correlated with body mass index (Pearson  $r=0.14$ ,  $p=6.31\times 10^{-3}$ ), raising the intriguing possibility that nicotine receptor mediation of ACE-2 may also be related to why obese individuals have made up a considerable proportion of coronavirus disease 2019 (COVID-19) cases [2].
